# Supplementary material
Source: publisher site journal article supplement (https://www.spandidos-publications.com/2478/downloadSupplementary)

Figure S1. Expression of miR-21-3p and miR-21-5p in Thp-1 cells transfected with LV-miR-21, LV-miR-21-5p inhibitor and LV-control lentiviral vectors. (A) Expression of miR-21-5p in LV-miR-21 and LV-control cells. \*\*P<0.01. (B) Expression of miR-21-3p in LV-miR-21 and LV-control cells (n=5). \*\*P<0.01. (C) Expression fold-change of miR-21-5p relative to miR-21-3p in Thp-1 cells infected with LV-miR-21 (n=5). U6 gene as an internal control. (D) Expression of miR-21-5p in LV-miR-21-5p inhibitor and LV-control cells (n=5). \*\*P<0.01. (E) Expression of miR-21-3p in LV-miR-21-5p inhibitor and LV-control cells (n=5). miR, microRNA; LV, lentivirus.

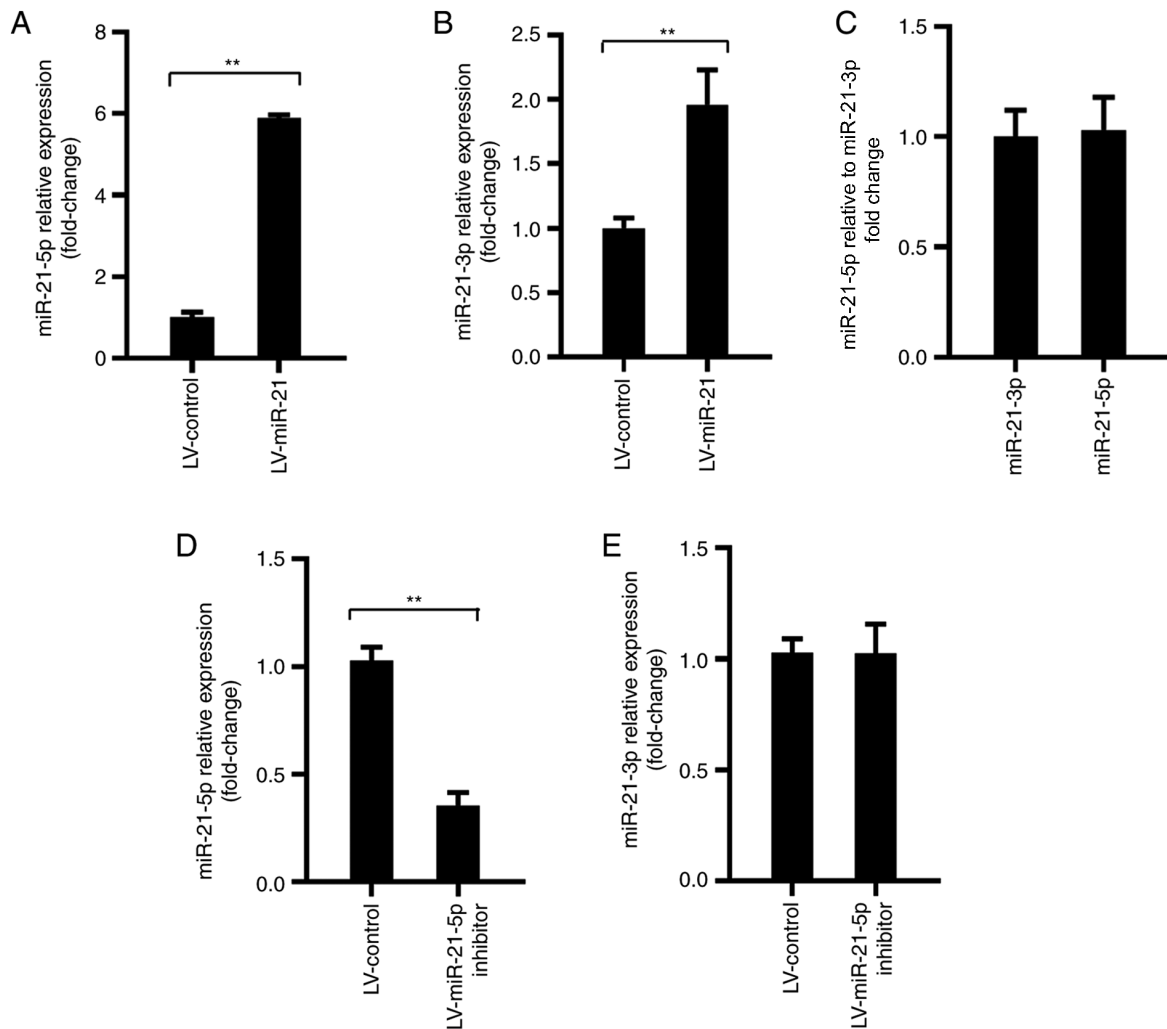

Figure S2. The expression of miR-21-5p in 293 cells transfected with miR-21-5p mimic, miR-21-5p inhibitor or NC was detected by reverse transcription-quantitative PCR (n=5). \*\*P<0.01. miR, microRNA; NC, negative control.

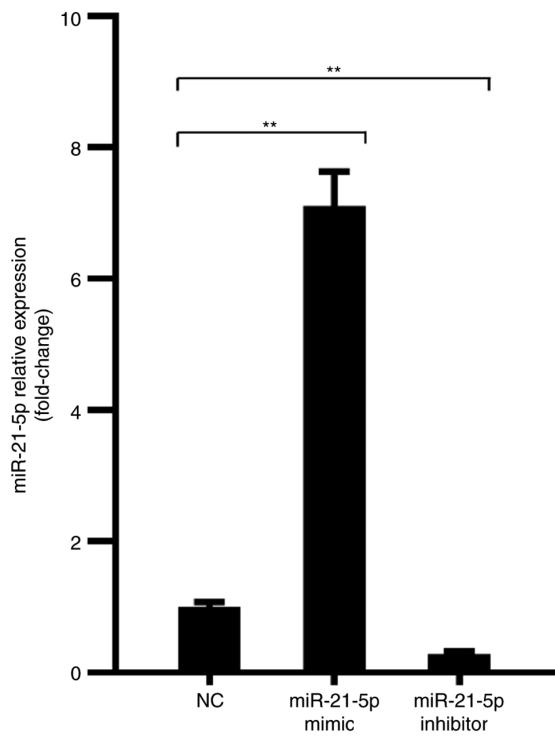

Figure S3. MDM2 protein expression in Thp-1 cells. (A) MDM2 protein expression was analyzed by western blotting in Thp-1 normal cells, and in cells transfected with LV-miR-21, LV-miR-21-5p inhibitor or LV-control. (B) The blots were quantified and presented as MDM2/GAPDH (n=3). \*P<0.05. miR, microRNA; LV, lentivirus; MDM2, murine doubleminute 2.

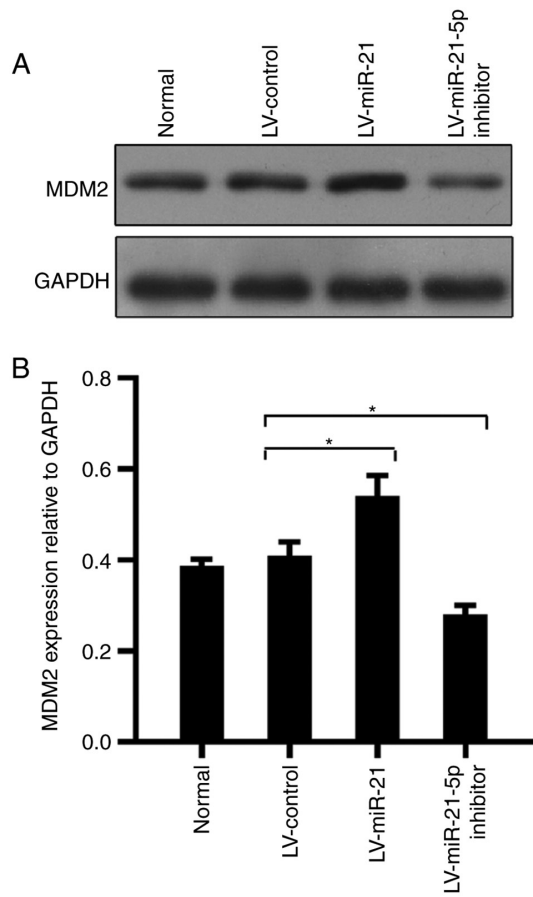

Supplement: Supplementary file 1 [file downloadSupplementary]
